# Supplementary material for: Biomass productivity and productivity of fatty acids and amino acids of microalgae strains as key characteristics of suitability for biodiesel production
Source: PubMed Central journal article supplement (PMC3478515; doi:10.1007/s10811-012-9795-3), 2012-02-11
Supplement: 10811_2012_9795_MOESM1_ESM.pdf [file 10811_2012_9795_MOESM1_ESM.pdf]

## Online Resources

**Online Resource 1** Content of lipids (filled circles), fatty acids (open circles) and amino acids (open triangles) of 38 screened microalgae strains. For reference strain *Chlorella vulgaris* 132 the content of lipids ranged between 18.5 and 23.3% dw, of fatty acids between 3.1 and 4.1% dw and of amino acids between 35.7 and 41.9% dw over the whole test period

**Online Resource 2** Effect of light intensity on the number of double bonds per fatty acid molecule (*solid line*) and on the quotient of summarised C16-fatty acids and summarised C18-fatty acids (*dashed line*) in strain *Chlorella sp.* 800

**Online Resource 3** Spectrum of fatty acids palmitic (C16:0), palmitoleic (C16:1), stearic (C18:0), oleic (C18:1 $\omega$ 9), linoleic (C18:2 $\omega$ 6),  $\alpha$ -linolenic (C18:3 $\omega$ 3) given as relative amounts to 100% in *Chlorella sp.* 800 under different light intensities: 200  $\mu\text{mol photons m}^{-2} \text{s}^{-1}$  (1), 300  $\mu\text{mol photons m}^{-2} \text{s}^{-1}$  (2), 400  $\mu\text{mol photons m}^{-2} \text{s}^{-1}$  (3), 500  $\mu\text{mol photons m}^{-2} \text{s}^{-1}$  (4)

**Online Resource 4** Spectrum of amino acids alanine, arginine, aspartic acid, glutamic acid, lysine, leucine given as relative amounts to 100% in five microalgal strains with highest amino acid productivity. *Chlorella vulgaris* 132 (1), *Chlorella sp.* 589 (2), *Chlorella sp.* 313 (3), *Chlorella minutissima* 494 (4), *Chlorella sp.* 11 (5)

**Online Resource 5** Correlation of biomass productivity with lipid content (a;  $r^2=0.08$ ), with content of fatty acids (b;  $r^2=0.00$ ) and with content of amino acids (c;  $r^2=0.05$ ) in 39 microalgae strains including the reference strain

**Online Resource 6** Correlation of productivity of lipids with content of lipids (a;  $r^2=0.56$ ), of productivity of fatty acids with content of fatty acids (b;  $r^2=0.42$ ) and of productivity of amino acids with content of amino acids (c;  $r^2=0.14$ ) in 39 microalgae strains including the reference strain

**Online Resource 7** Correlation of lipid content with content of fatty acids ( $r^2=0.29$ ) in 39 microalgae strains including the reference strain

**Online Resource 8** Spectrum of amino acids alanine, arginine, aspartic acid, glutamic acid, lysine, leucine given as relative amounts to 100% in *Chlorella sp.* 800 under different cultivation temperatures: 15°C (1), 25°C (2), 35°C (3)

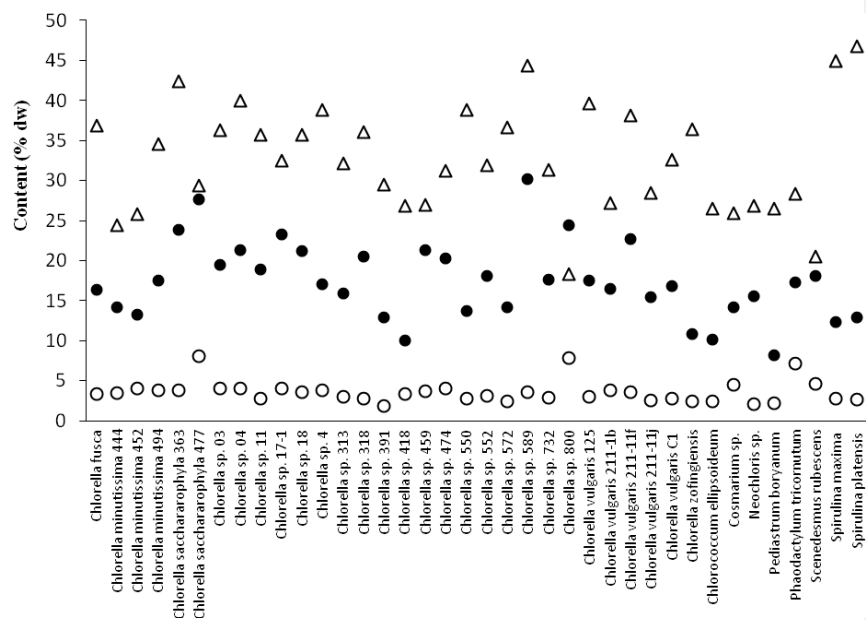

**Online Resource 1** Content of lipids (filled circles), fatty acids (open circles) and amino acids (open triangles) of 38 screened microalgae strains. For reference strain *Chlorella vulgaris* 132 the content of lipids ranged between 18.5 and 23.3% dw, of fatty acids between 3.1 and 4.1% dw and of amino acids between 35.7 and 41.9% dw over the whole test period

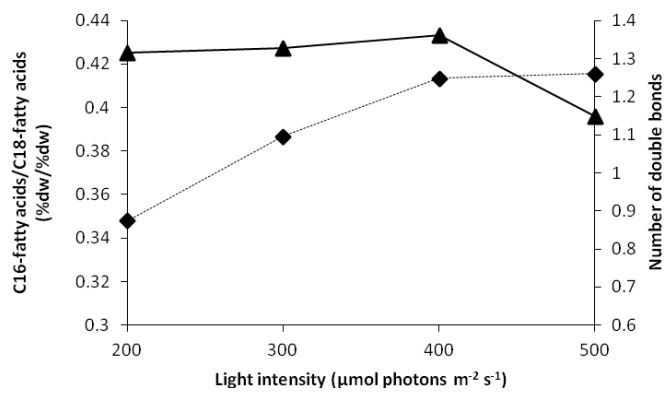

**Online Resource 2** Effect of light intensity on the number of double bonds per fatty acid molecule (*solid line*) and on the quotient of summarised C16-fatty acids and summarised C18-fatty acids (*dashed line*) in strain *Chlorella sp. 800*

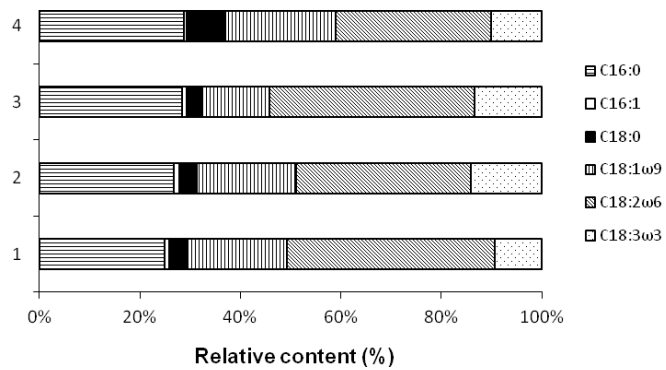

**Online Resource 3** Spectrum of fatty acids palmitic (C16:0), palmitoleic (C16:1), stearic (C18:0), oleic (C18:1ω9), linoleic (C18:2ω6), α-linolenic (C18:3ω3) given as relative amounts to 100% in *Chlorella sp. 800* under different light intensities: 200 μmol photons m<sup>-2</sup> s<sup>-1</sup> (1), 300 μmol photons m<sup>-2</sup> s<sup>-1</sup> (2), 400 μmol photons m<sup>-2</sup> s<sup>-1</sup> (3), 500 μmol photons m<sup>-2</sup> s<sup>-1</sup> (4)

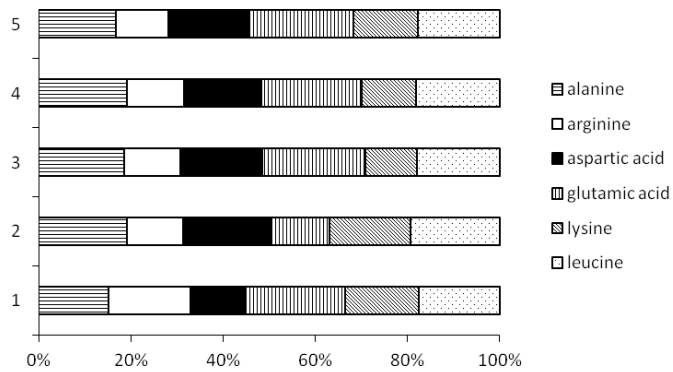

**Online Resource 4** Spectrum of amino acids alanine, arginine, aspartic acid, glutamic acid, lysine, leucine given as relative amounts to 100% in five microalgal strains with highest amino acid productivity. *Chlorella vulgaris* 132 (1), *Chlorella sp.* 589 (2), *Chlorella sp.* 313 (3), *Chlorella minutissima* 494 (4), *Chlorella sp.* 11 (5)

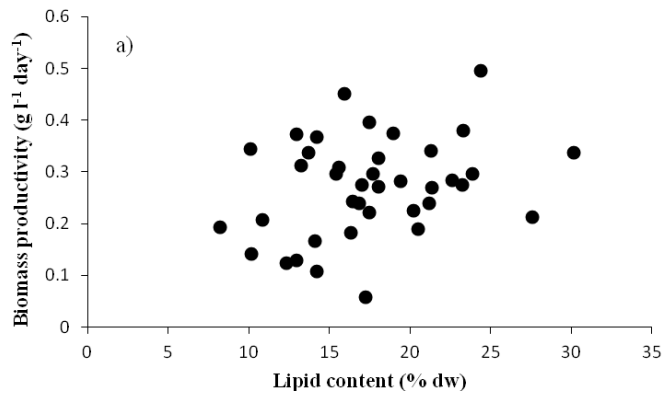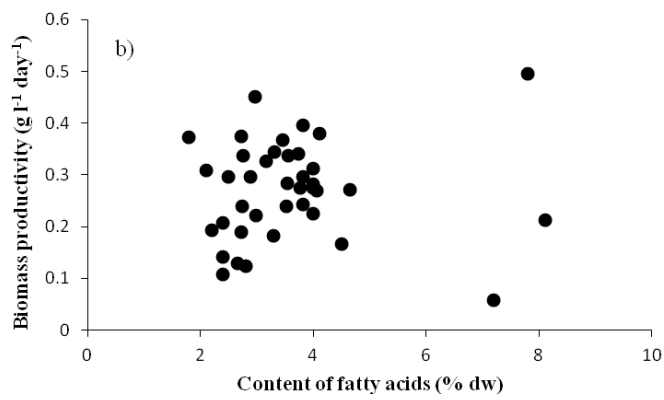

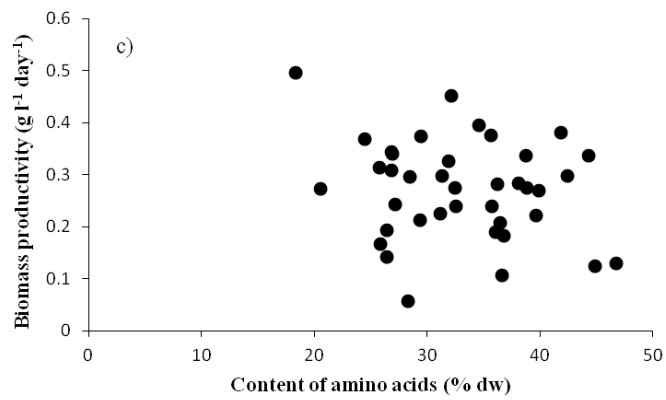

**Online Resource 5** Correlation of biomass productivity with lipid content (a;  $r^2=0.08$ ), with content of fatty acids (b;  $r^2=0.00$ ) and with content of amino acids (c;  $r^2=0.05$ ) in 39 microalgae strains including the reference strain



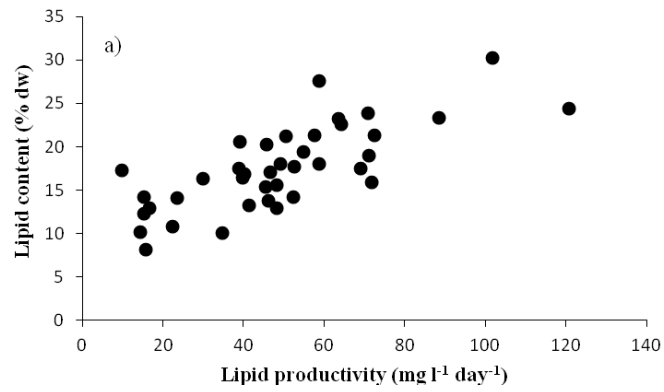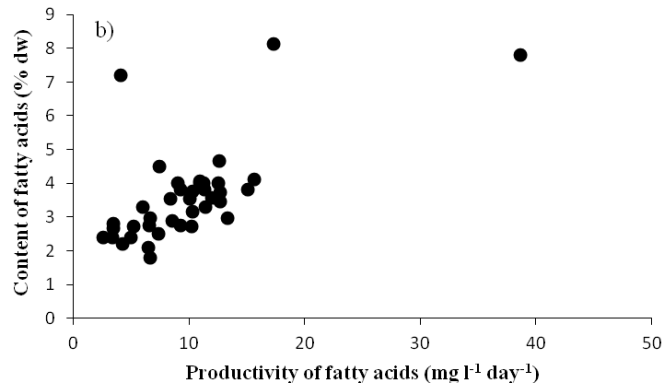

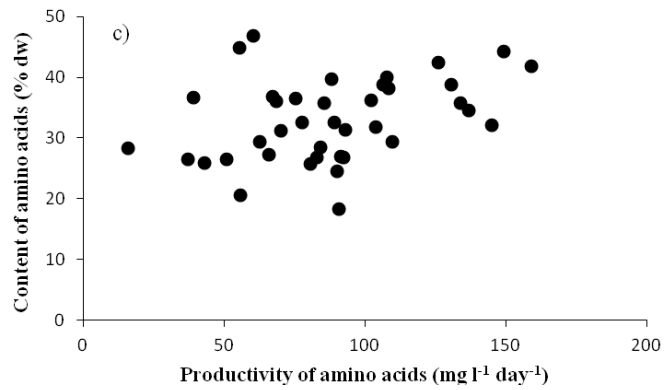

**Online Resource 6** Correlation of productivity of lipids with content of lipids (a;  $r^2=0.56$ ), of productivity of fatty acids with content of fatty acids (b;  $r^2=0.42$ ) and of productivity of amino acids with content of amino acids (c;  $r^2=0.14$ ) in 39 microalgae strains including the reference strain

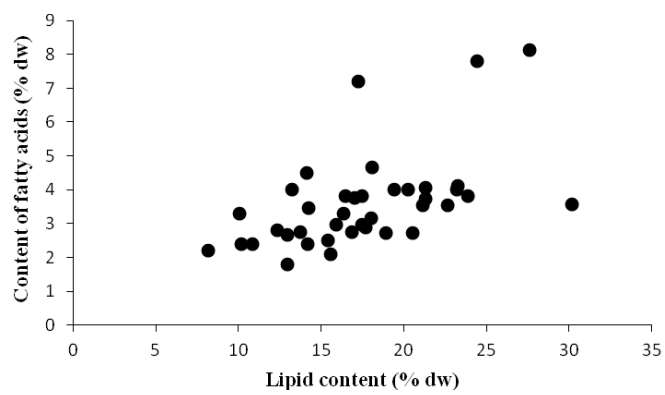

**Online Resource 7** Correlation of lipid content with content of fatty acids ( $r^2=0.29$ ) in 39 microalgae strains including the reference strain

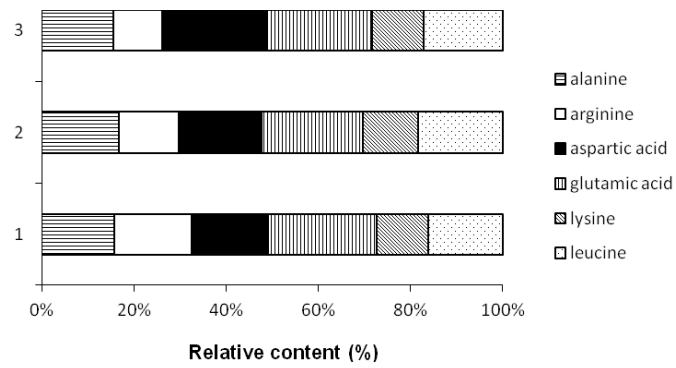

**Online Resource 8** Spectrum of amino acids alanine, arginine, aspartic acid, glutamic acid, lysine, leucine given as relative amounts to 100% in *Chlorella sp.* 800 under different cultivation temperatures: 15°C (1), 25°C (2), 35°C (3)
